# Supplementary material for: TGF-β induced EMT and stemness characteristics are associated with epigenetic regulation in lung cancer
Source: Sci Rep. 2020 Jun 30;10:10597. doi: 10.1038/s41598-020-67325-7 (PMC7326979; doi:10.1038/s41598-020-67325-7)

**TGF- $\beta$  induced EMT and stemness characteristics are associated with epigenetic regulation in lung cancer**

Bit Na Kim<sup>1,2,#</sup>, Dong Hyuck Ahn<sup>1,2,#</sup>, Nahyeon Kang<sup>1,2</sup>, Chang Dong Yeo<sup>1,2</sup>, Young Kyoon Kim<sup>1</sup>, Kyo Young Lee<sup>3</sup>, Tae-Jung Kim<sup>3</sup>, Sug Hyung Lee<sup>4</sup>, Mi Sun Park<sup>5</sup>, Hyeon Woo Yim<sup>5</sup>, Jong Y. Park<sup>6</sup>, Chan Kwon Park<sup>1,2,\*</sup> and Seung Joon Kim<sup>1,2,\*</sup>

<sup>1</sup>Department of Internal Medicine, College of Medicine, The Catholic University of Korea, Seoul, Korea

<sup>2</sup>Postech-Catholic Biomedical Engineering Institute, College of Medicine, The Catholic University of Korea, Seoul, Korea

<sup>3</sup>Department of Hospital Pathology, College of Medicine, The Catholic University of Korea, Seoul, Korea

<sup>4</sup>Department of Pathology, College of Medicine, The Catholic University of Korea, Seoul, Korea

<sup>5</sup>Department of Biostatistics, Clinical Research Coordinating Center, The Catholic University of Korea, Seoul, Korea

<sup>6</sup>Department of Cancer Epidemiology, Moffitt Cancer Center, Tampa, FL, USA

#These authors contributed equally to this work.

\*These authors also contributed equally to this work.

Address correspondence to Chan Kwon Park, MD, PhD

Department of Internal Medicine, St. Mary's Hospital, Postech-Catholic Biomedical Engineering Institute, College of Medicine, 222, Banpo-daero, Seocho-gu, Seoul, 06591, Korea

E-mail: ckpaul@catholic.ac.kr, Tel: 82-2-3779-1334

Address correspondence to Seung Joon Kim, MD, PhD

Department of Internal Medicine, Seoul St. Mary's Hospital, Postech-Catholic Biomedical Engineering Institute, College of Medicine, 222, Banpo-daero, Seocho-gu, Seoul, 06591, Korea

E-mail: cmcksj@catholic.ac.kr, Tel: 82-2-2258-6063

# Supplementary figure 1. Uncropped blots from figure 2 of the manuscript

E-cadherin

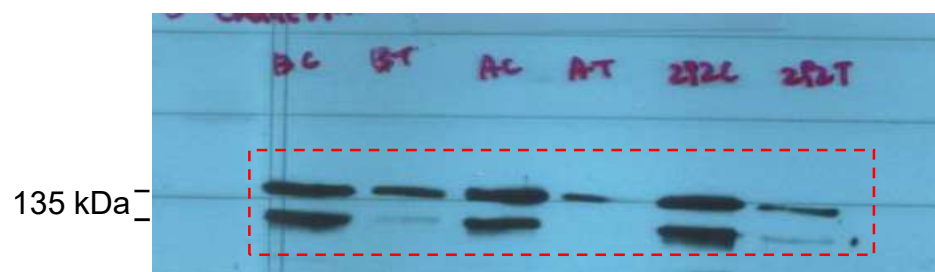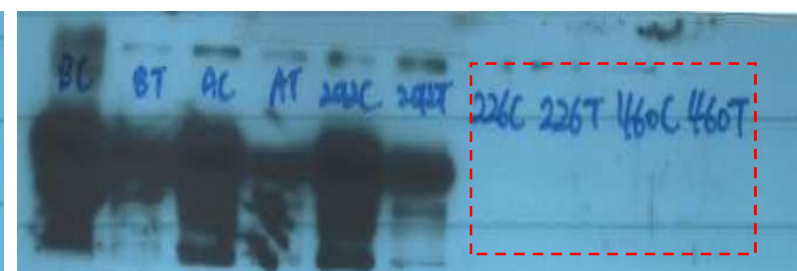

N-cadherin

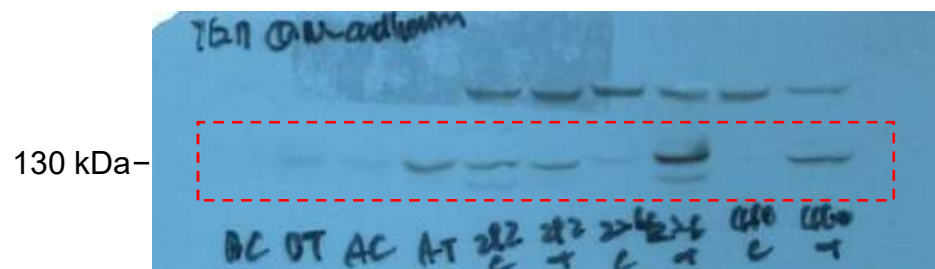

Fibronectin

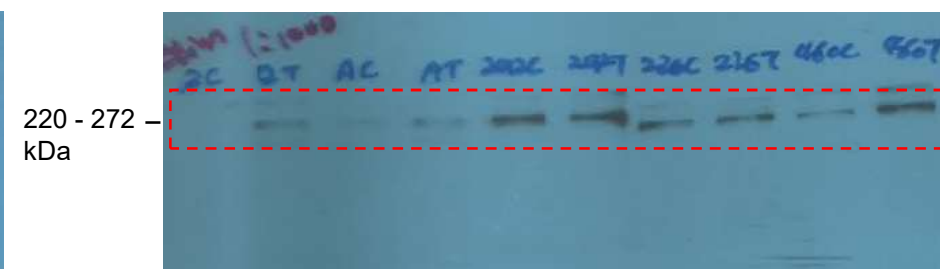

Vimentin

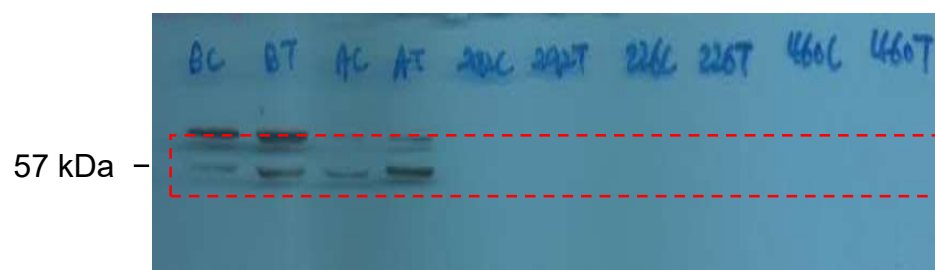

Slug

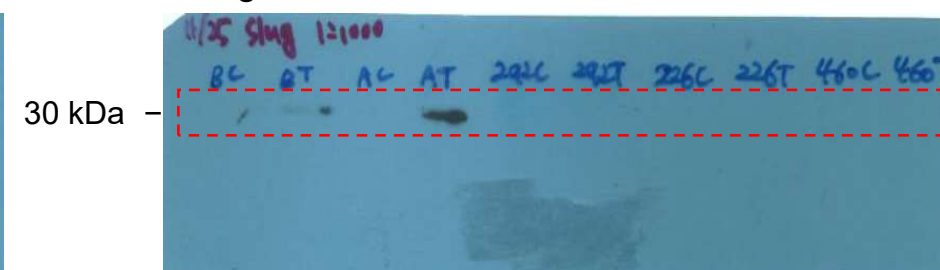

Snail

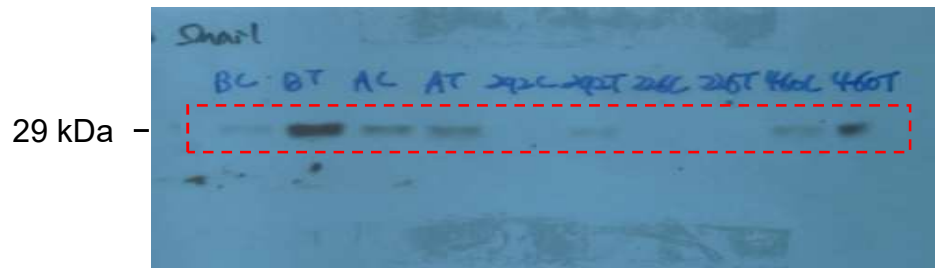

GAPDH

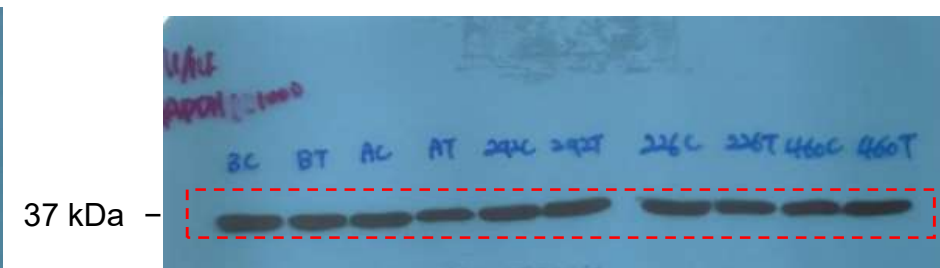

## Supplementary figure 2. Uncropped blots from figure 5B of the manuscript

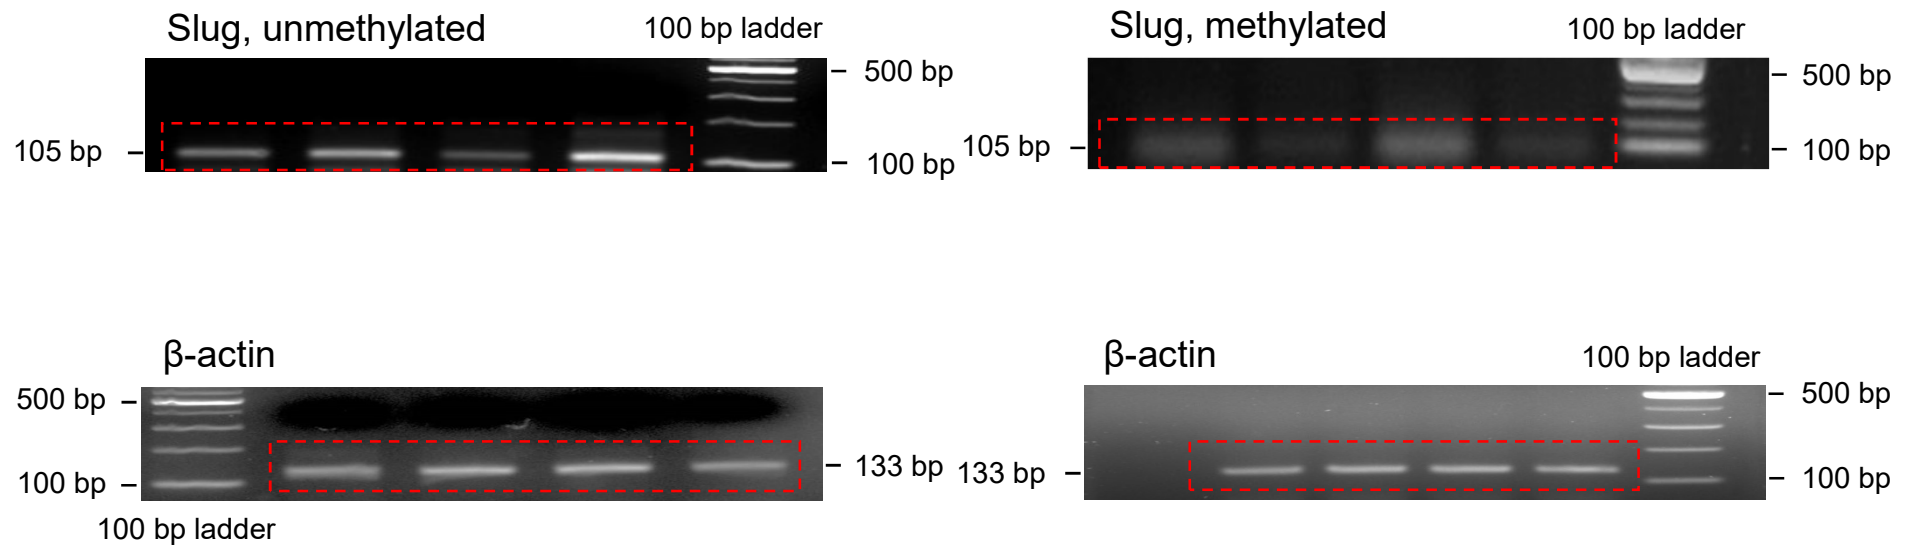

# Supplementary figure 3. Uncropped blots from figure 5C of the manuscript

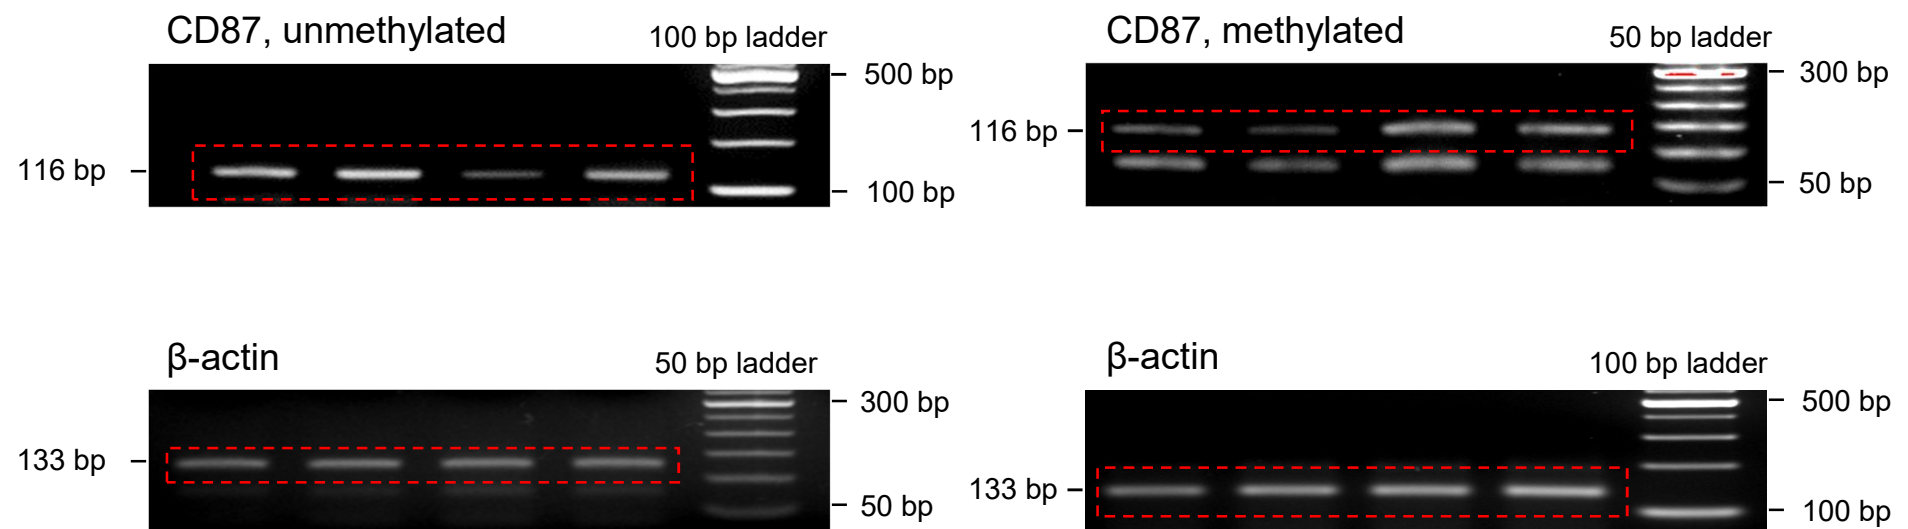

Supplement: Supplementary file 1 — Supplementary Information [file 41598_2020_67325_MOESM1_ESM.pdf]
